# Supplementary material for: A global assessment of recent trends in gastrointestinal cancer and lifestyle‐associated risk factors
Source: PubMed Central journal article supplement — Cancer Commun (Lond). 2021 Sep 25;41(11):1137–51. doi: 10.1002/cac2.12220 (PMC8626600; doi:10.1002/cac2.12220), 2021-09-25
Supplement: CAC2-41-1137-s002.pdf [file CAC2-41-1137-s002.pdf]

## **Supplementary Information**

Submitted by Lili Lu, Christina S. Mullins, Clemens Schafmayer,  
Sebastian Zeiig and Michael Linnebacher

Supplementary Figure S1

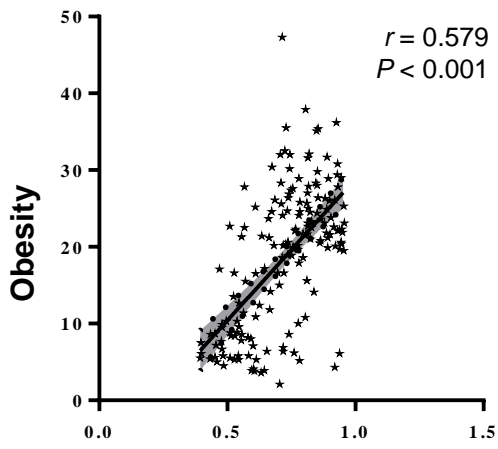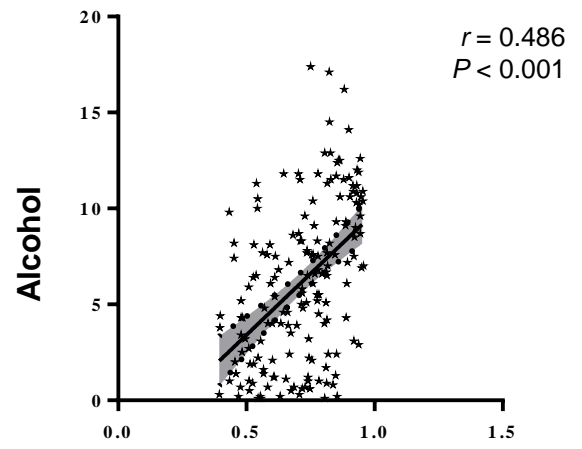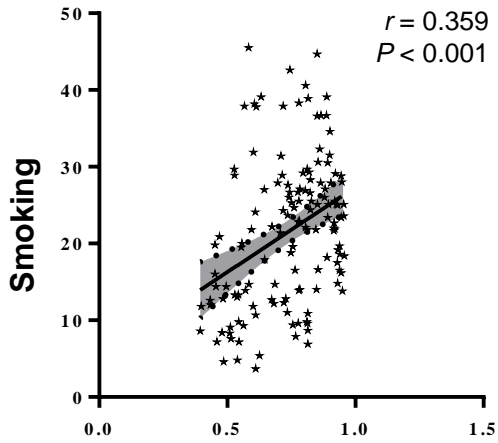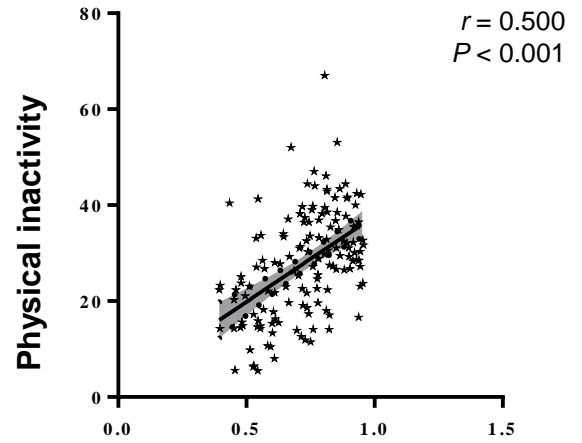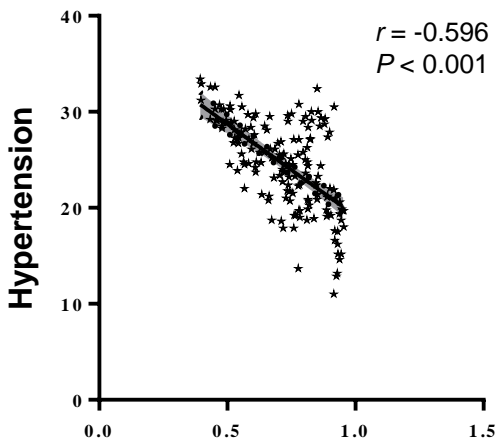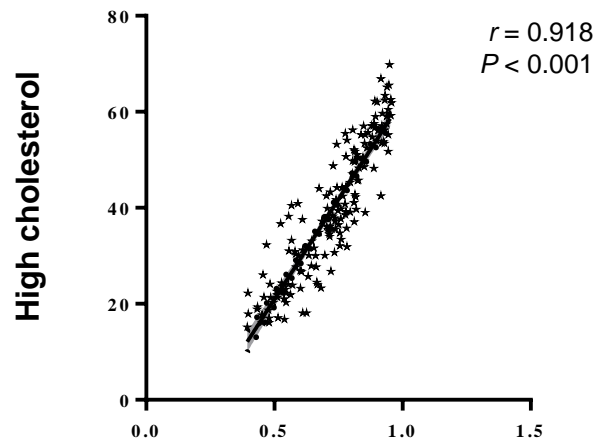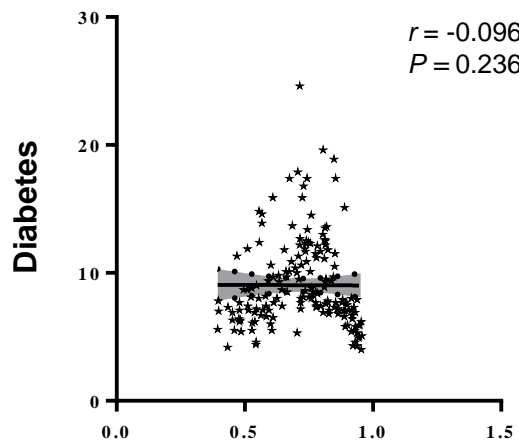

HDI

# Supplementary Figure S2 (Incidence, ≥ 50 years, male)

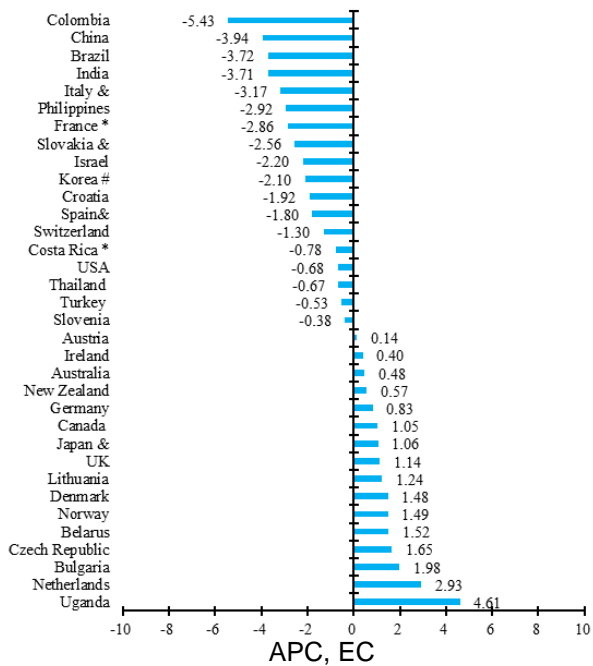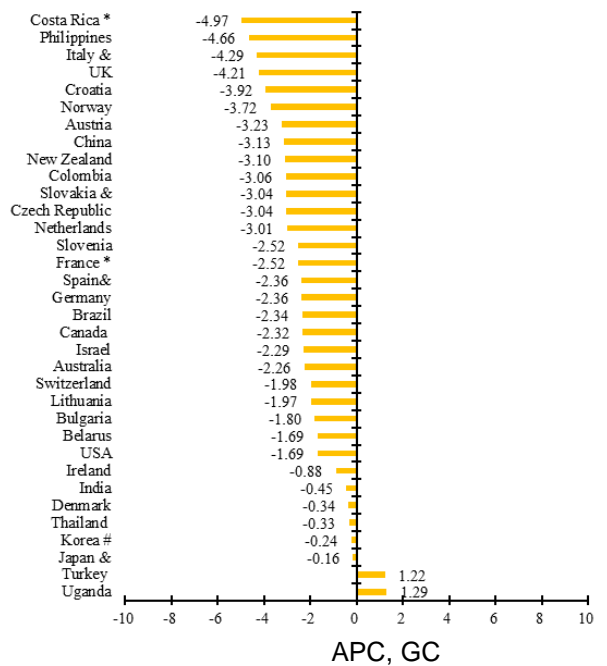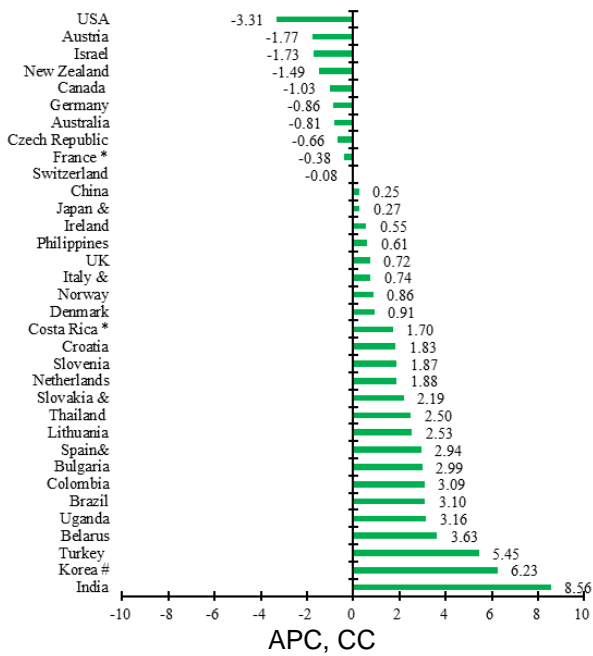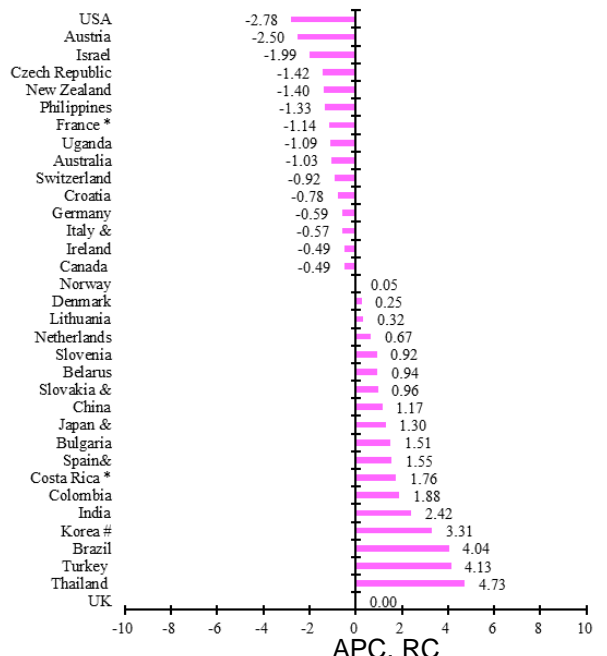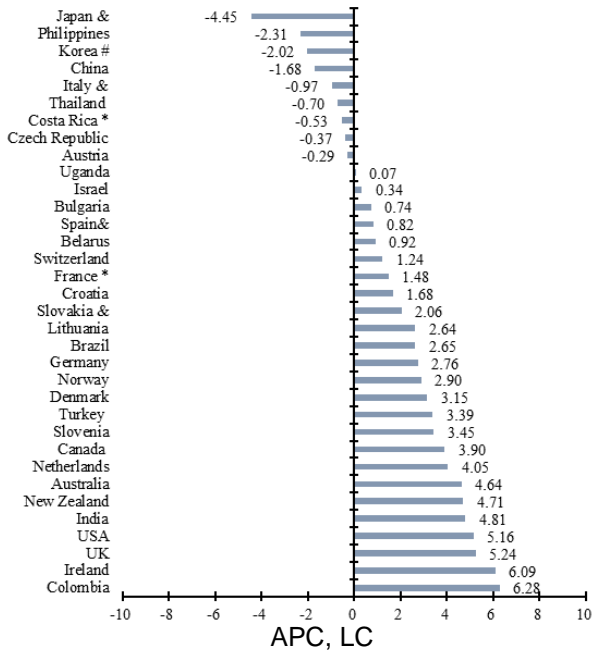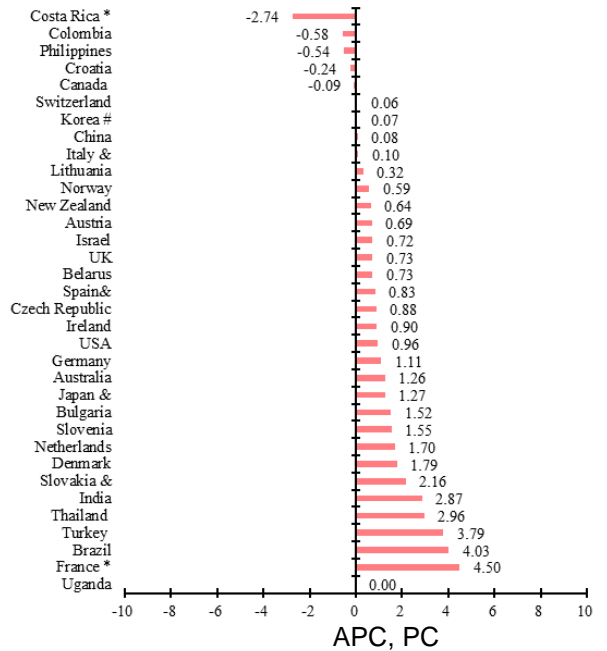

# Supplementary Figure S3 (Incidence, ≥ 50 years, female)

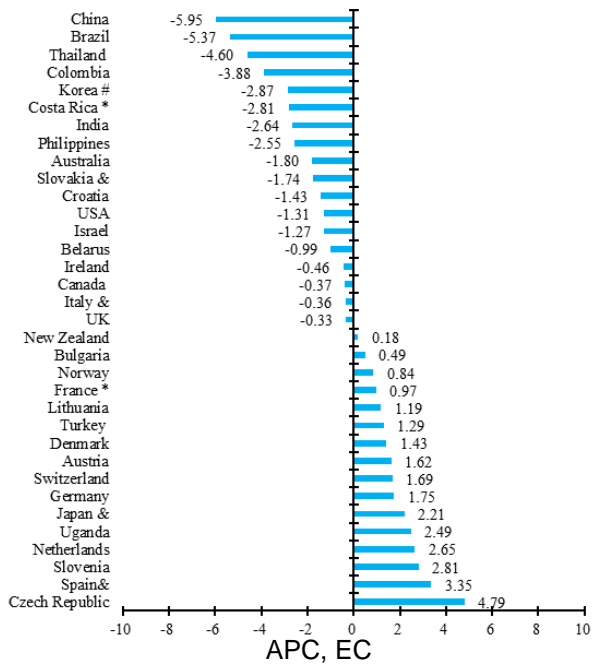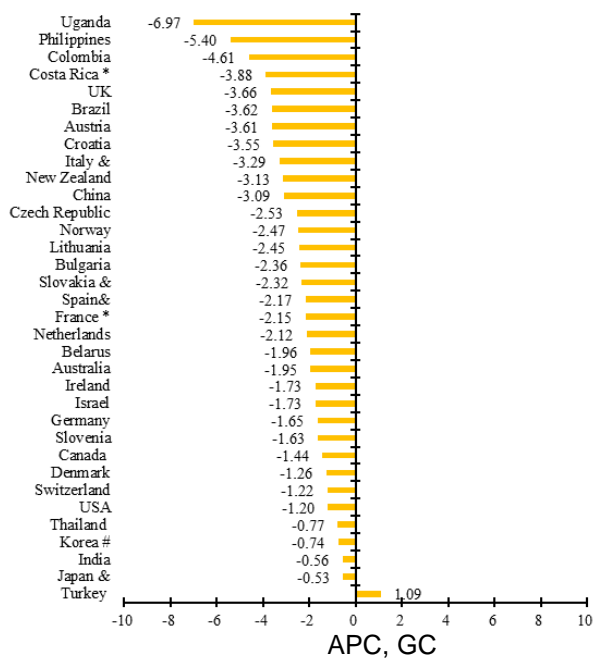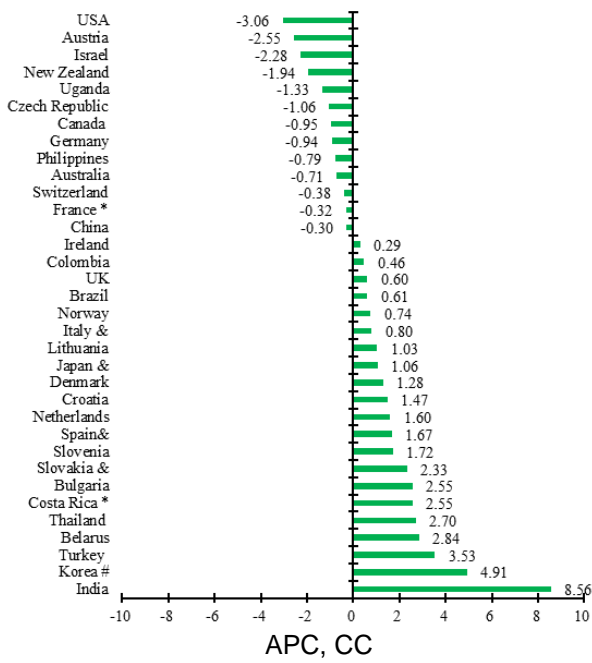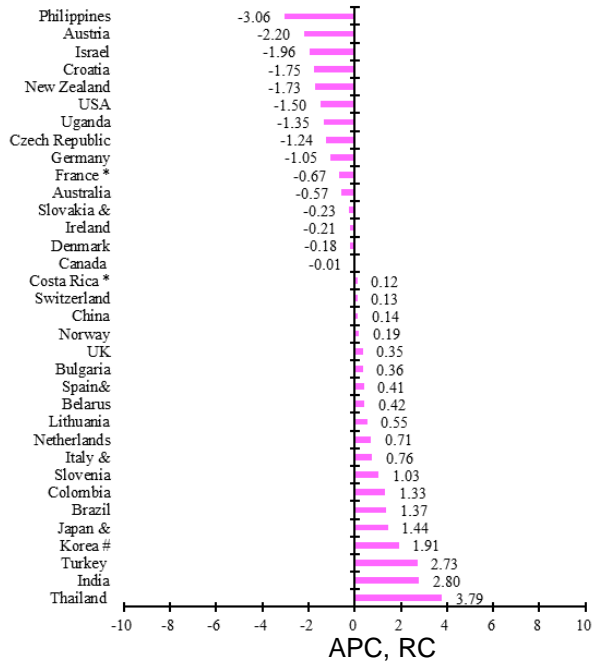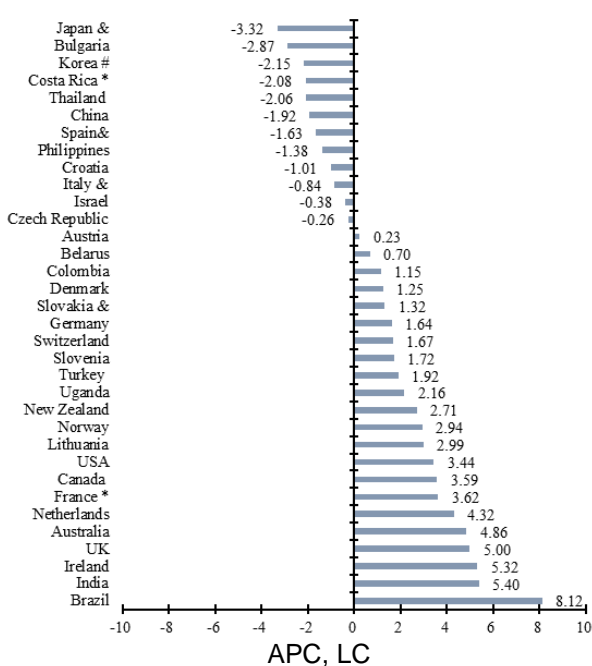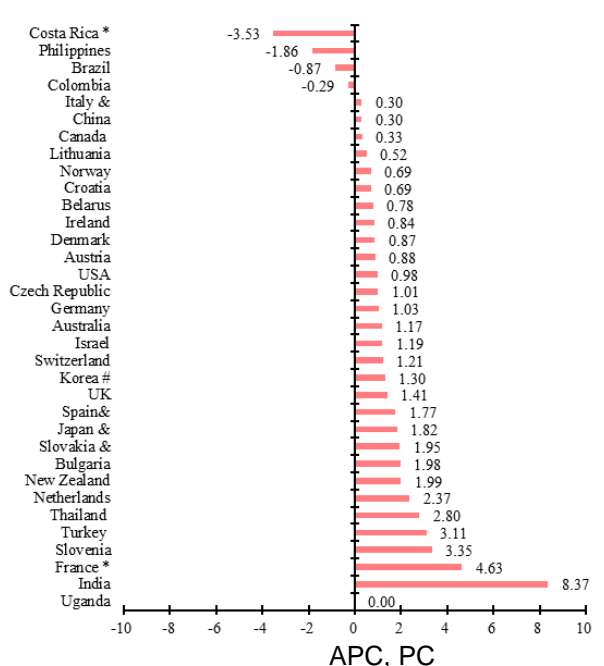

# Supplementary Figure S4 (Incidence, < 50 years, male)

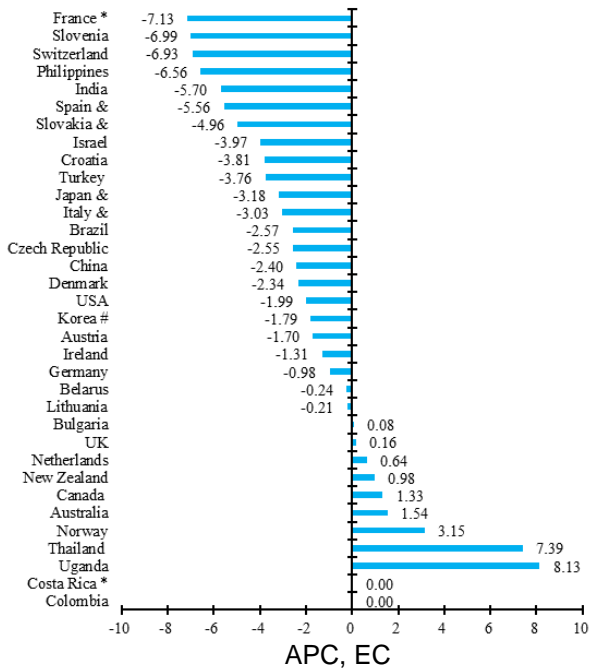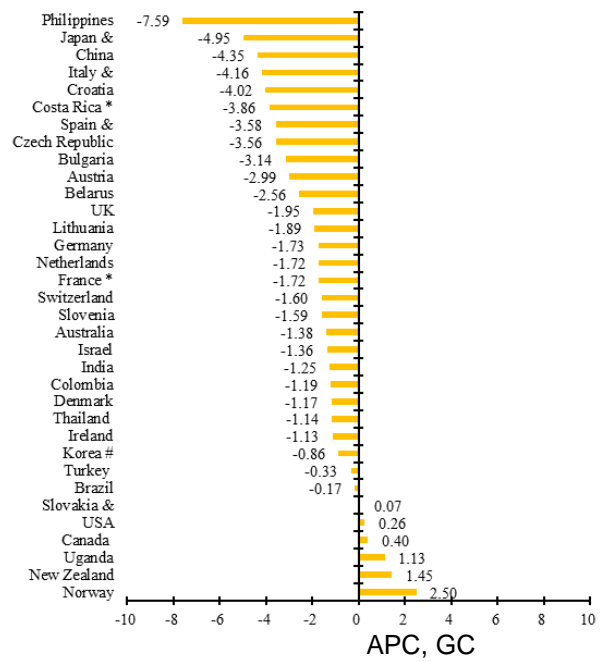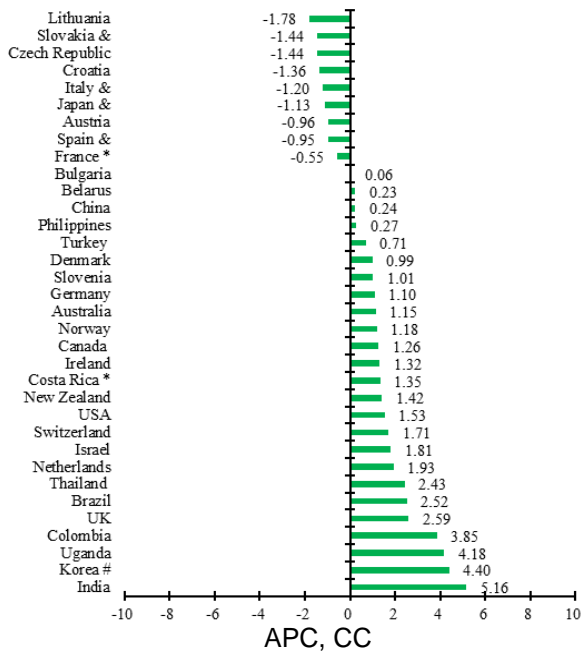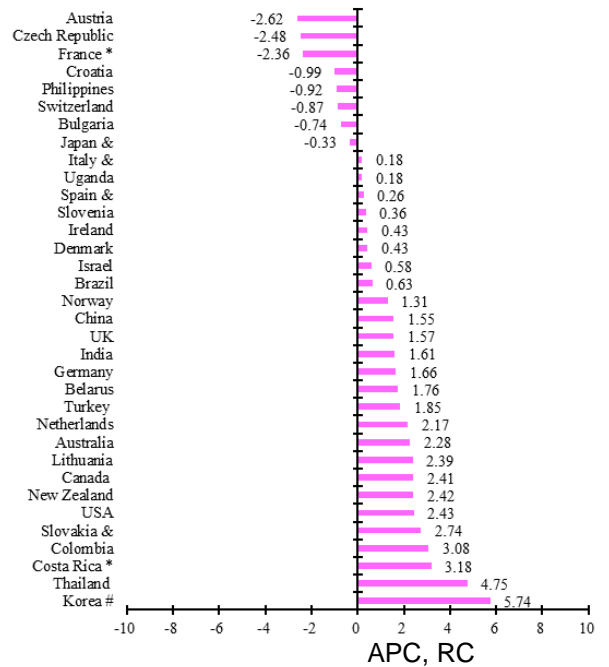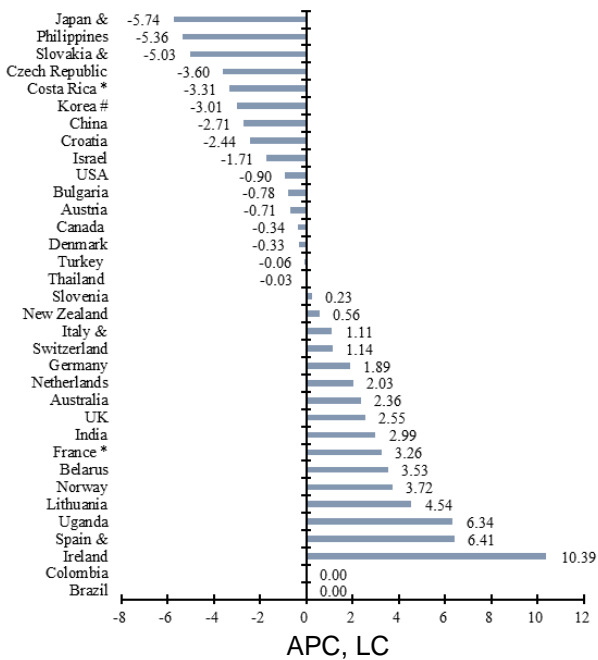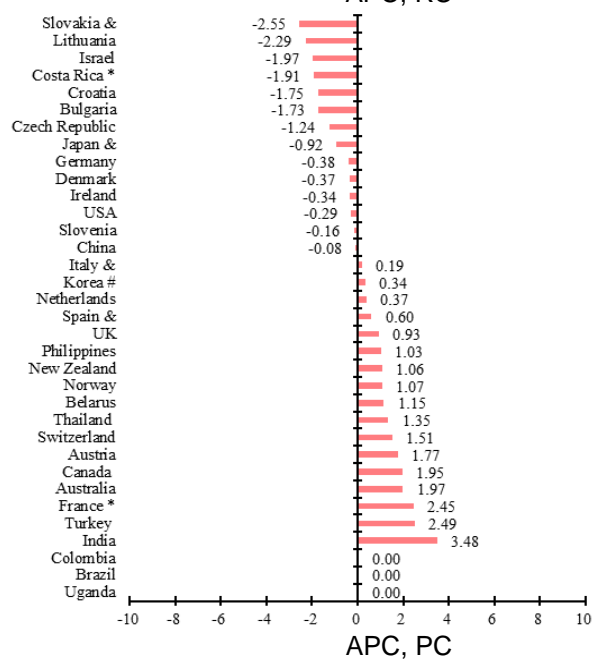

# Supplementary Figure S5 (Incidence, < 50 years, female)

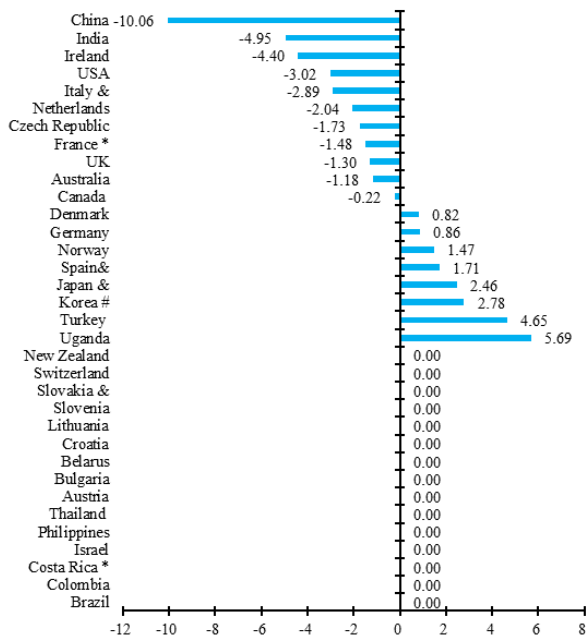

APC, EC

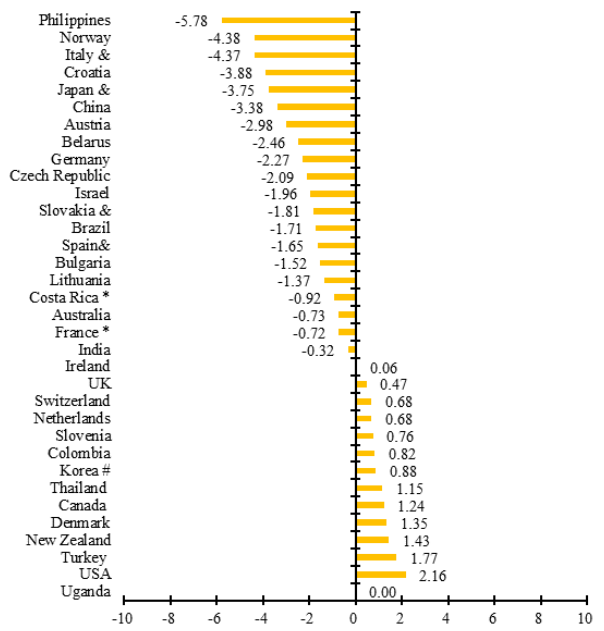

APC, GC

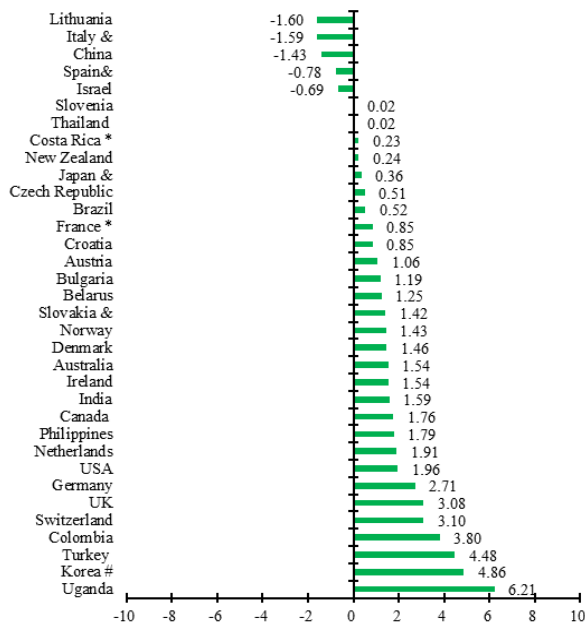

APC, CC

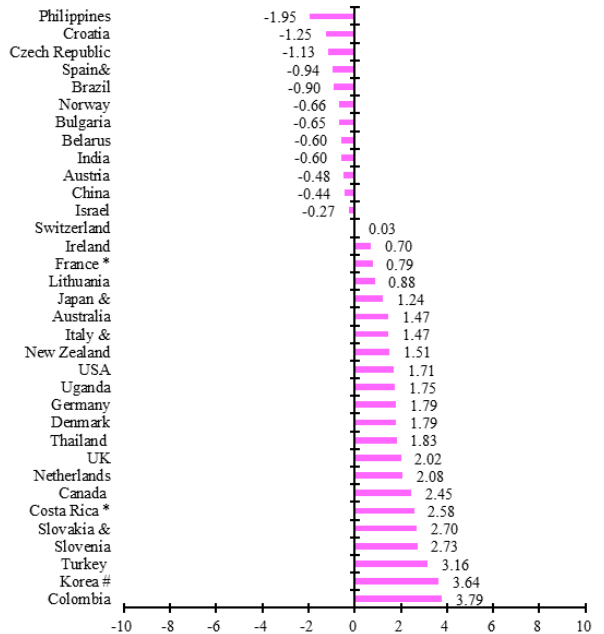

APC, RC

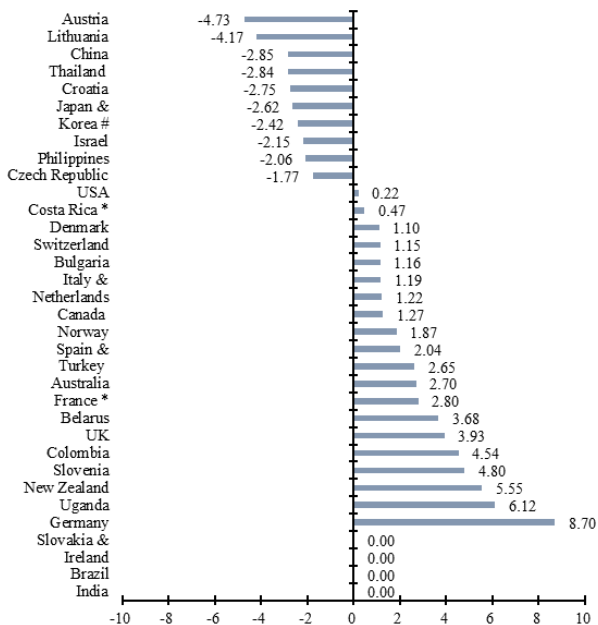

APC, LC

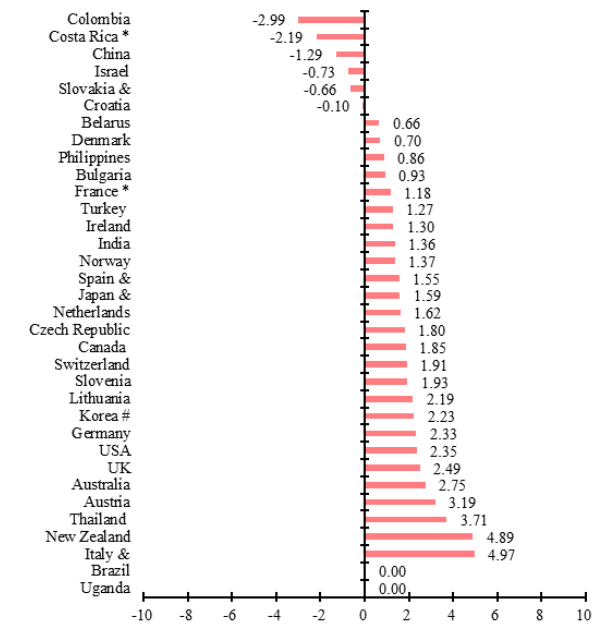

APC, PC

# Supplementary Figure S6 (Mortality, < 50 years, male)

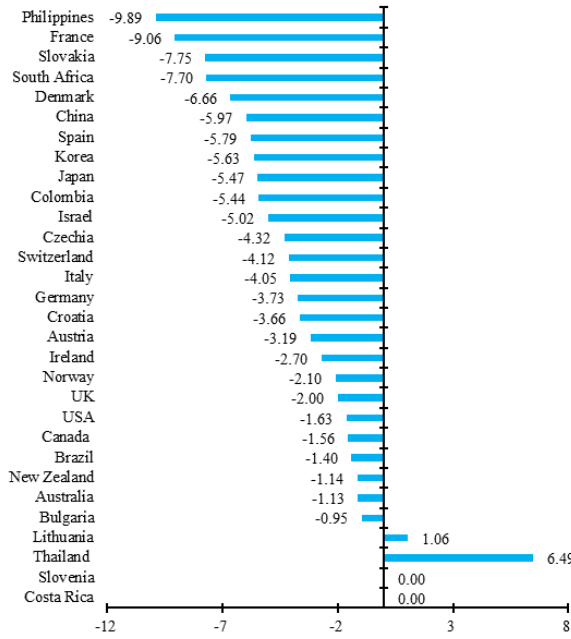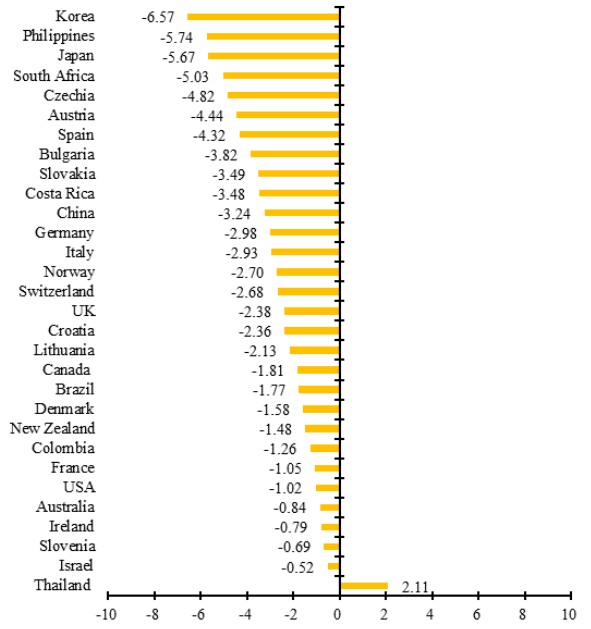

APC, EC

APC, GC

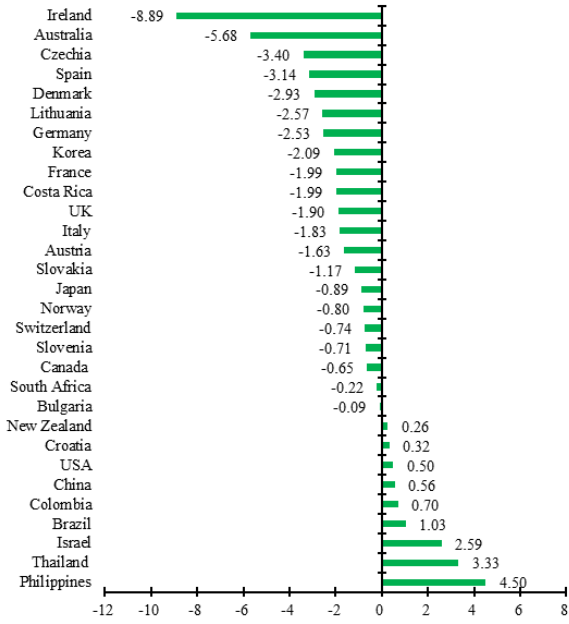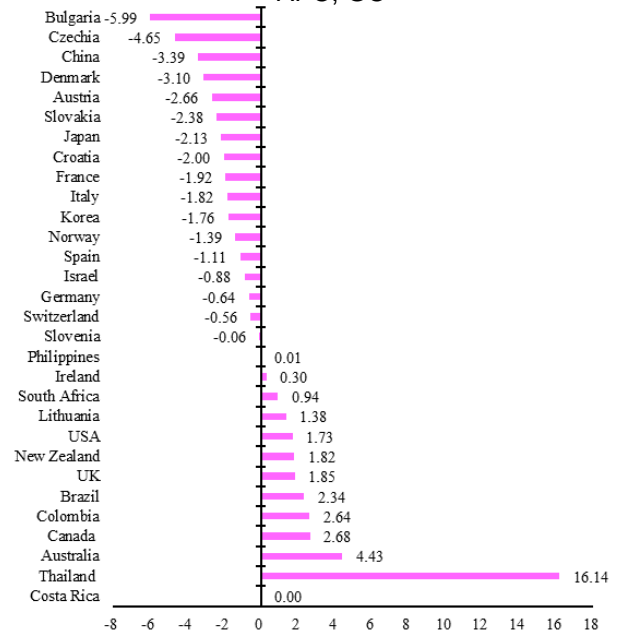

APC, CC

APC, RC

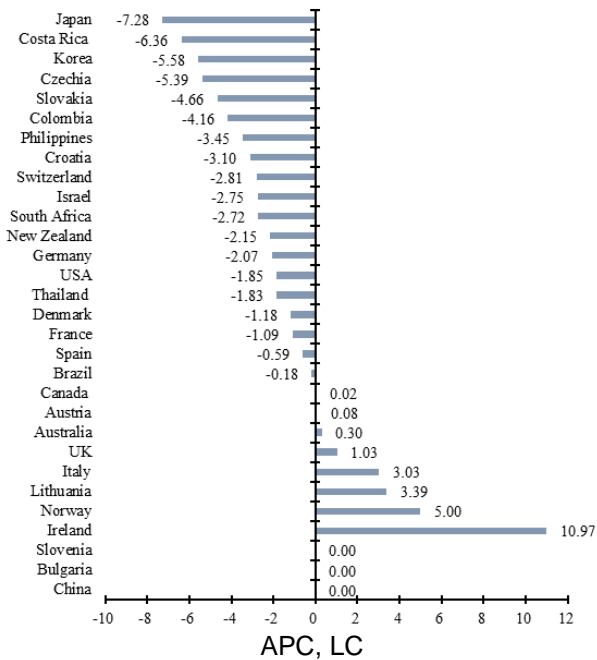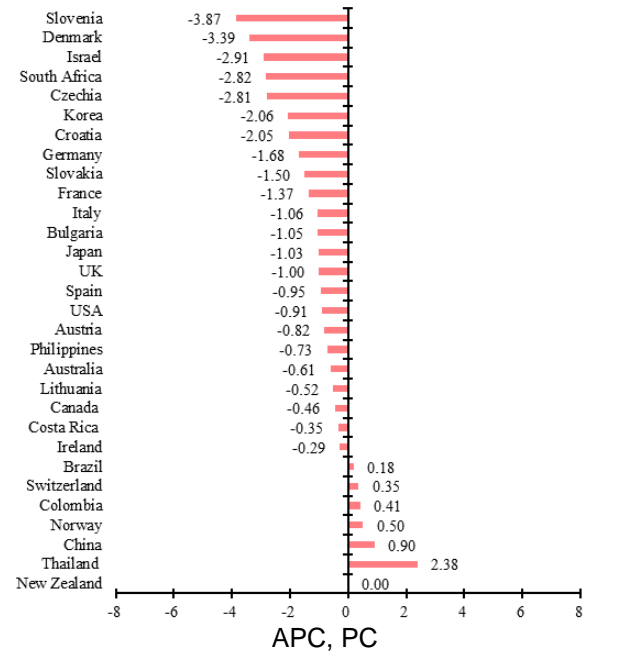

APC, LC

APC, PC

# Supplementary Figure S7 (Mortality, ≥ 50 years, male)

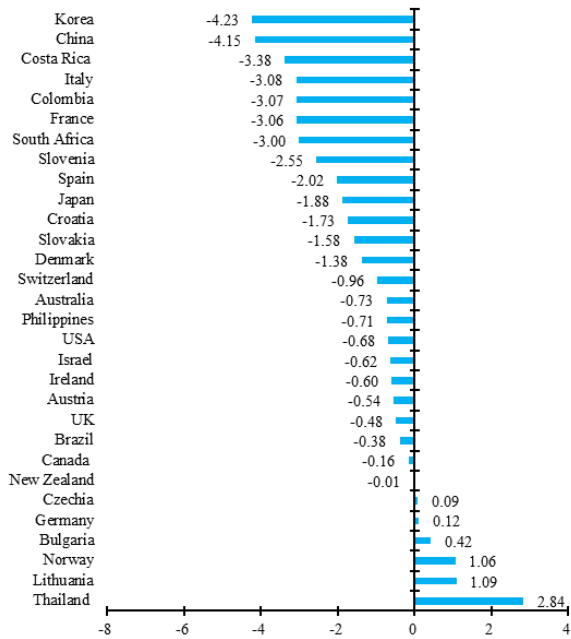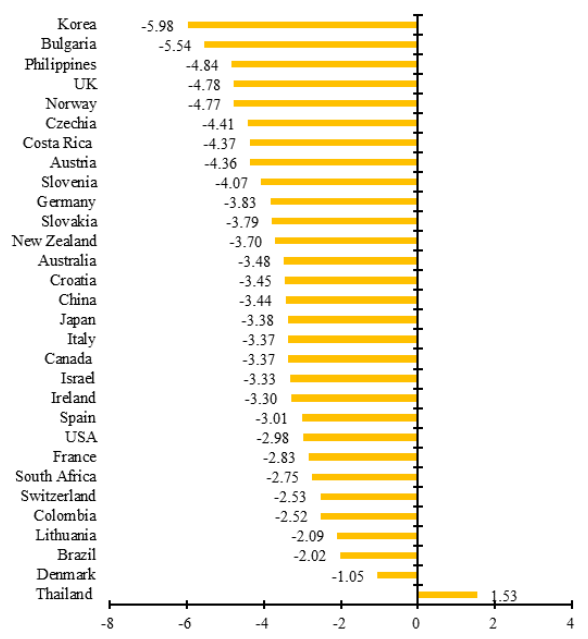

APC, EC

APC, GC

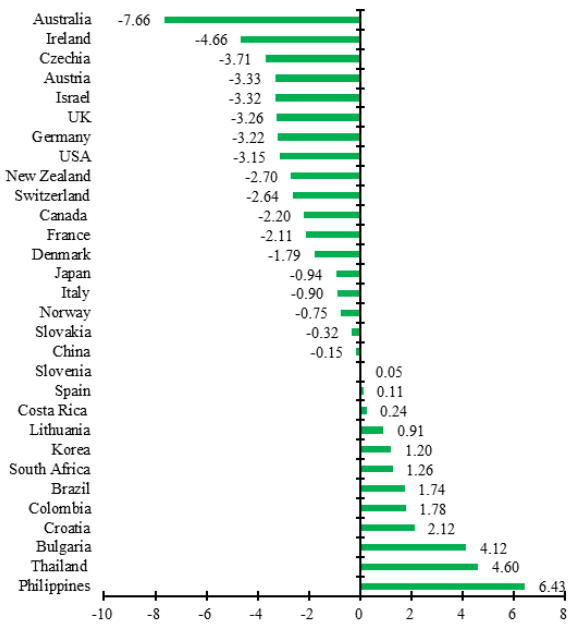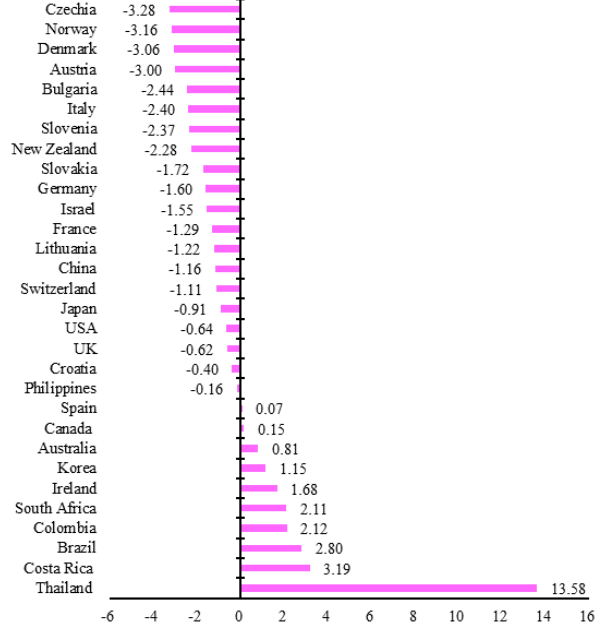

APC, CC

APC, RC

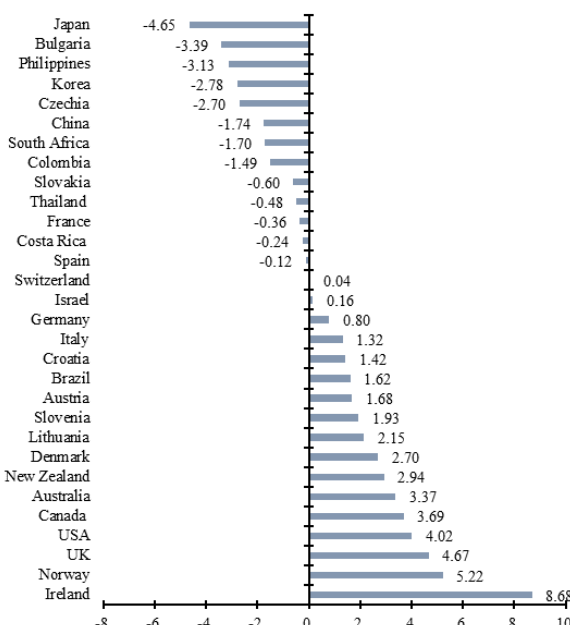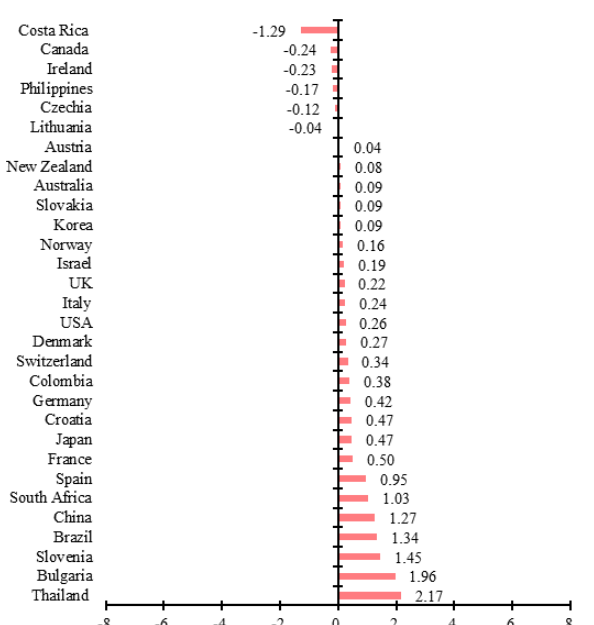

APC, LC

APC, PC



# Supplementary Figure S8 (Mortality, < 50 years, female)

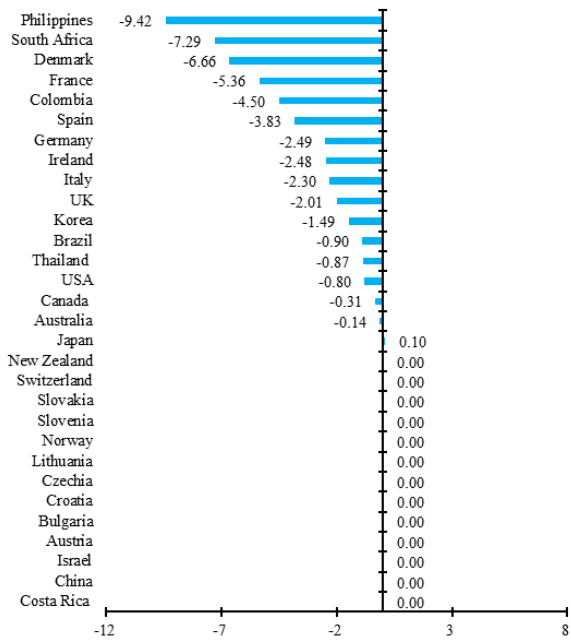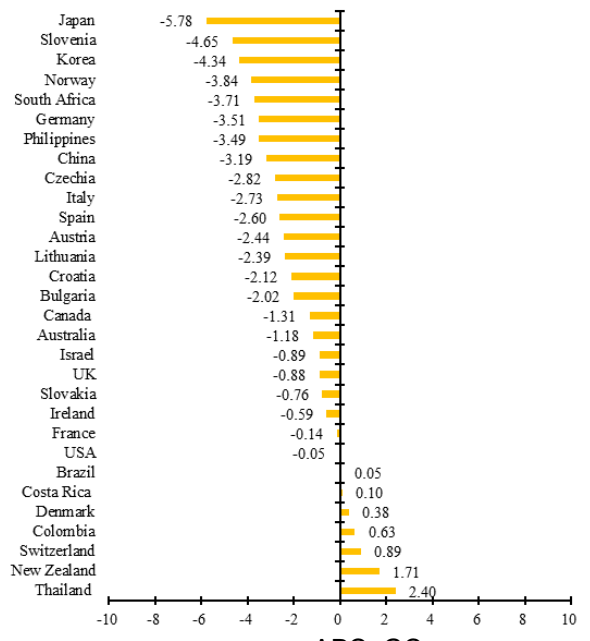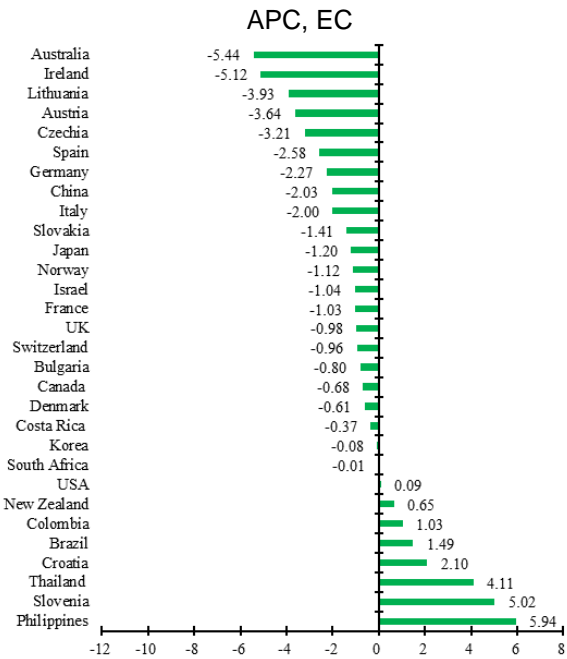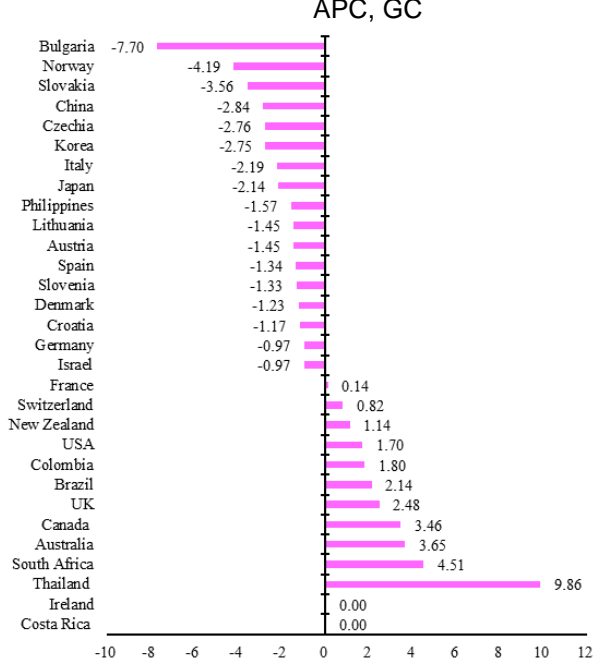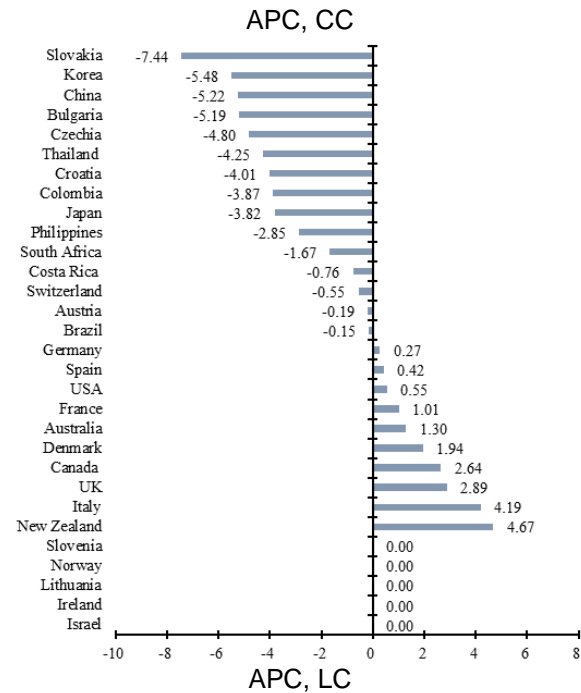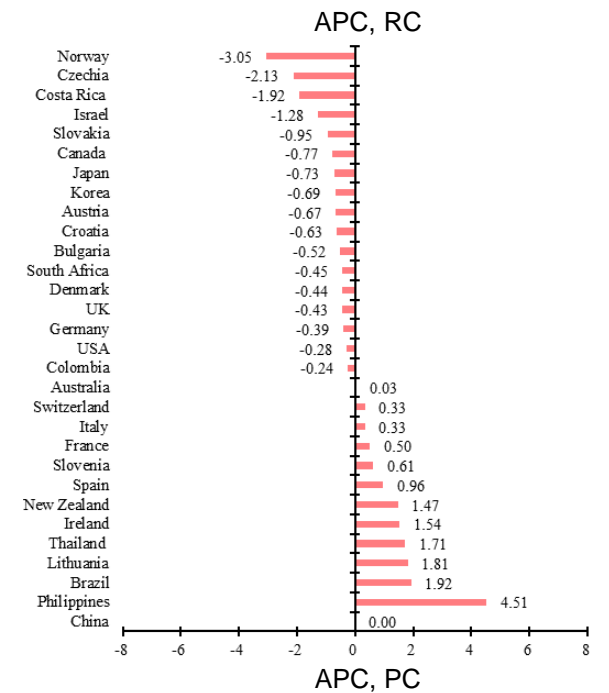

# Supplementary Figure S9 (Mortality, ≥ 50 years, female)

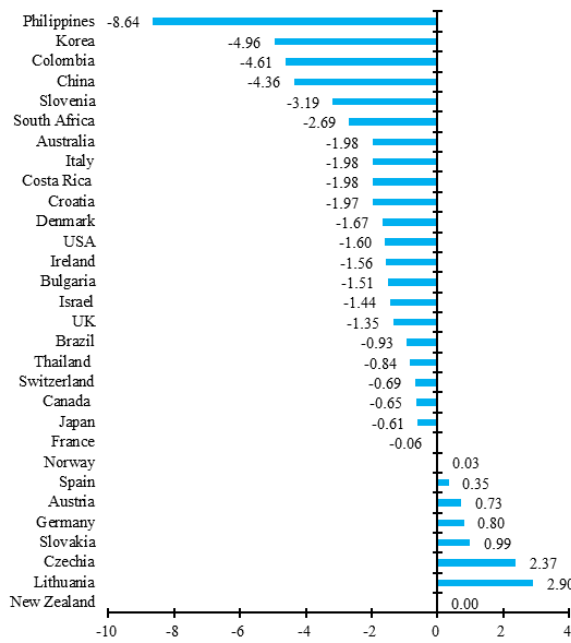

APC, EC

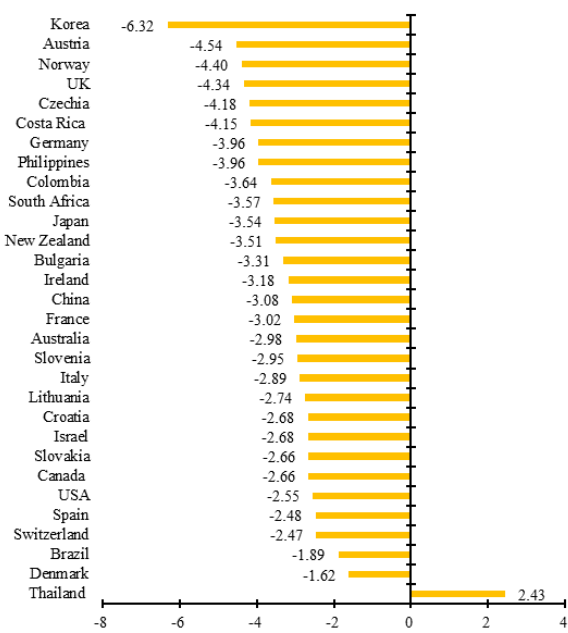

APC, GC

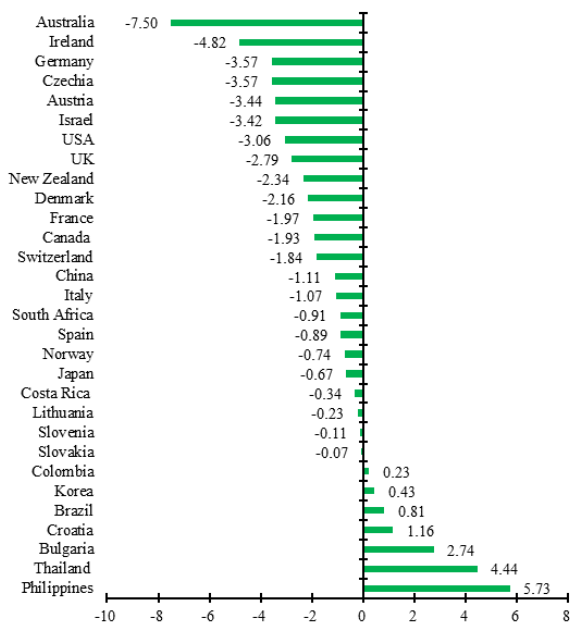

APC, CC

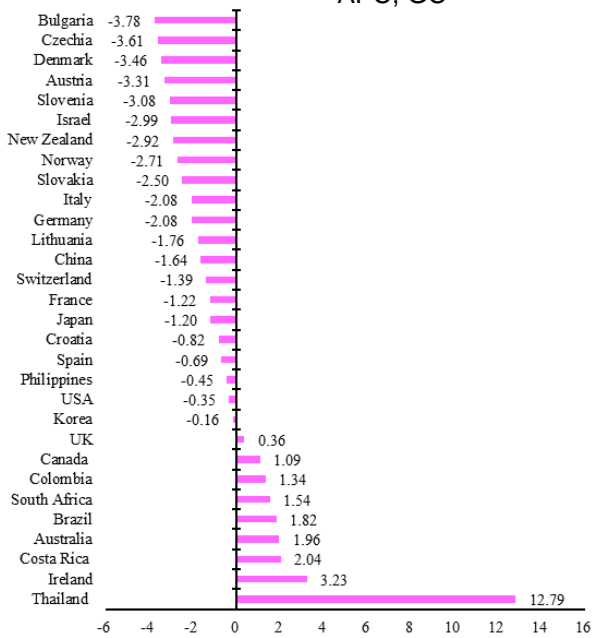

APC, RC

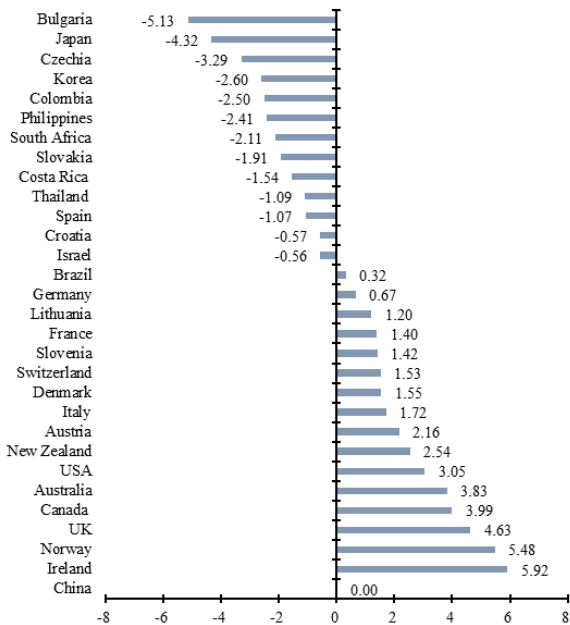

APC, LC

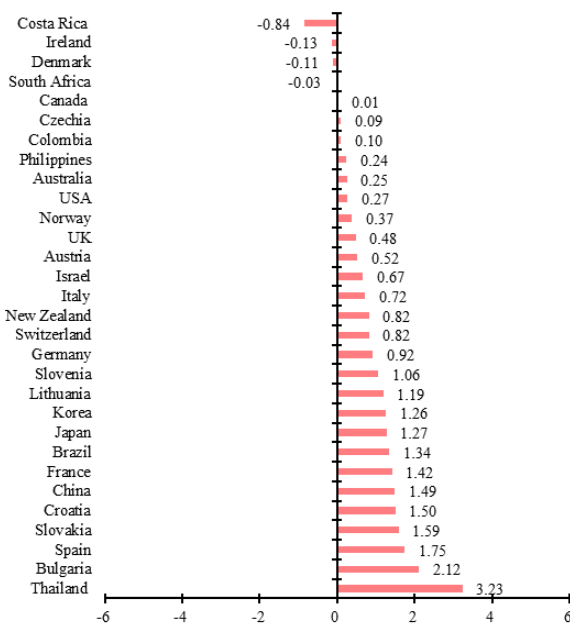

APC, PC
